# Supplementary material for: An LTR Retrotransposon-Derived Gene Displays Lineage-Specific Structural and Putative Species-Specific Functional Variations in Eutherians
Source: PubMed Central journal article supplement (PMC4917564; doi:10.3389/fchem.2016.00026), 2016-06-23
Supplement: DataSheet1.pdf [file DataSheet1.pdf]

|                                        |                                                             |                                            |    |
|----------------------------------------|-------------------------------------------------------------|--------------------------------------------|----|
| human                                  | MEKCTKSSSTMQVEPS----                                        | FLQAEENLILRPQMHPHTTENTAKRGQVMPALATTVMVPVY  | 56 |
| chimpanzee                             | MEKCTKSSPTMQVEPS----                                        | FLQAEENLILRPQMHPHTTENTAKRGQVMPALATTVMVPVY  | 56 |
| pygmy_chimpanzee                       | MEKCTKSSPTMQVEPS----                                        | FLQAEENLILRPQMHPHTTENTAKRGQVMPALATTVMVPVY  | 56 |
| western_lowland_gorilla                | -----                                                       | MQHPTTENTAKRGQVMPALATTVMVPVY               | 28 |
| Sumatran_orangutan                     | ----MKSPPTMQVEPS----                                        | FLQAEENLILRPQMHPHTTENTAKRGQVMPALATTVMVPVY  | 52 |
| northern_white-cheeked_gibbon_a        | MEKCTKSPPTMQVEPS----                                        | FLQAEENLILRPQMHPHTTENTAKRGQVMPALATTVMVPVY  | 56 |
| northern_white-cheeked_gibbon_b        | -----                                                       |                                            | 0  |
| sooty_mangabey                         | MEKCTKSPPTLQVEPS----                                        | FLQGENLILRPQMHPHTTENTAKRGQVMPALATTVMVPLN   | 56 |
| green_monkey                           | MEKCTKSPPTLQVEPS----                                        | FLQAEENLILRPQMHPHTTENTAKRGQVMPALATTVMVPVN  | 56 |
| crab-eating_macaque                    | MEKCTKSPPTLQVEPS----                                        | FLQGENLILRPQMHPHTTENTAKRGQVMPALATTVMVPVN   | 56 |
| rhesus_monkey                          | MEKCTKSPPTLQVEPS----                                        | FLQGENLILRPQMHPHTTENTAKRGQVMPALATTVMVPVN   | 56 |
| pig-tailed_macaque                     | MEKCTKSPPTLQVEPS----                                        | FLQGENLILRPQMHPHTTENTAKRGQVMPALATTVMVPVN   | 56 |
| drill                                  | MEKCTKSPPTLQVEPS----                                        | FLQGENLILRPQMHPHTTENTAKRGQVMPALATTVMVPVN   | 56 |
| olive_baboon                           | MEKCTKSPPTLQVEPS----                                        | FLQGENLILRPQMHPHTTENTAKRGQVMPALATTVMVPVN   | 56 |
| Colobus_angolensis_palliatus           | MEKCTKSPPTLQVEPS----                                        | FLQAEENLILRPQMHPHTTENTAKRGQVMPALATTVMVPVN  | 56 |
| golden_snub-nosed_monkey               | MEKCTKSPPTLQVEPS----                                        | FLQAEENLILRPQMHPHTTENTAKRGQVMPALATTVMVPLN  | 56 |
| Mas_night_monkey                       | -----                                                       |                                            | 0  |
| common_marmoset                        | -----                                                       |                                            | 0  |
| Bolivian_squirrel_monkey               | -----                                                       |                                            | 0  |
| Philippine_tarsier                     | MDKTESPPTLQVESSDS--AVTNAENPILQSQMHPHIRENSALRGQVMPALAI       | IPVMPVPF                                   | 59 |
| gray_mouse_lemur                       | MEKYMESPPTLQAEPS----                                        | FPQAEENLTLQPQMHPHTKENSALDKQGMALATPAMTVPVC  | 56 |
| Coquerels_sifaka                       | MEKYTESPPTLQVEPS----                                        | FPQAEENLTLQPQMHPHTNDNPAALRGQVMPALATPVMVPVN | 56 |
| small-eared_galago                     | MEKYTESPPTLQVEPS----                                        | FPQAEENLTLRPQVQVHSTKESPALRGQVMPALATPGINVPC | 56 |
| Damara_mole-rat                        | -----                                                       |                                            | 0  |
| naked_mole-rat                         | -----                                                       |                                            | 0  |
| domestic_guinea_pig                    | -----                                                       |                                            | 0  |
| long-tailed_chinchilla                 | -----                                                       |                                            | 0  |
| degu                                   | -----                                                       |                                            | 0  |
| lesser_Egyptian_jerboa                 | MEKCTESPPTVQVEGS----                                        | FLGGDNLTLQPQMQLTKDNTALRRQGMVPLNTPMMPVSY    | 56 |
| Ords_kangaroo_rat                      | MEKCAESPPTLQVEPS----                                        | FPWGDNVMMQRHMQLHSEDNPTLKSQVMPVPTTAVTSTPY   | 56 |
| prairie_vole                           | MEKCTESPPTLKAETS----                                        | LLKGDNLIVPSQIEHPTDDNPTLREQVVPVFNIPVMSVPY   | 56 |
| Chinese_hamster                        | MEKCTKSPPTLKPETS----                                        | FLRGDSLILQPQMHPHTDDNPTLRQVVPVPLNTPVMSIPY   | 56 |
| golden_hamster                         | MEKCTESPPTLKVETS----                                        | FSRGDNLVLPQMHPHTDDNPTLRQVVPVPLNTPMMSTPY    | 56 |
| prairie_deer_mouse                     | MEKCTESPPTLKAGPS----                                        | FLRRDNLILQPQMHPHTDDNPTLRQVVPVPLNTPVMSLPY   | 56 |
| house_mouse                            | MEKCTESLPLNNAETS----                                        | FLRGGNLIQPQVQVHPTDDKPPITGQVVPALNTPVMSGPY   | 56 |
| Norway_rat                             | MEKCTESPPNNAETS----                                         | FLRGGNLIQPQVQVHPTDDKPPITGQVVPALNTPVMSGPY   | 56 |
| Upper_Galilee_mountains_blind_mole_rat | -----                                                       | MIVSQMQHLTDDNPAALRNHVPVSNTPVMSVSY          | 34 |
| thirteen-lined_ground_squirrel         | MEKCTESPPTLQVEPS----                                        | FLQGENLILQPQMHLTEENPALRGQVMPALATPVMVPVN    | 56 |
| rabbit                                 | MEECTESSSTLQVEPS----                                        | FPQAEENLNLQSQMHLAKENLALRGQVMPALATPAMTVPVC  | 56 |
| American_pika                          | MDKYTESPPTLQVEPS----                                        | FLQGENLNQPPQIQCLTKENLDFGDQVMPALATPVMVPVN   | 56 |
| Chinese_tree_shrew                     | MEKCTKSPSTLQGESS----                                        | FLQAEENLILQPQMHPHLSKENPTLKGQITPALATSVMSIPC | 56 |
| Sunda_flying_lemur                     | MERCOTESPPTLQVEPS----                                       | FIQEKLILQPQMHLTKKEPALRGQVMPASGTPVIVPVC     | 56 |
| dog                                    | MEKYTESPSTLQVEHS----                                        | SLQVENLILPPQIQHLTEENLDRGQVMPALATPVMVPVN    | 56 |
| domestic_ferret                        | MEKYTESPPTLQVEHS----                                        | SLQVENLILPPQIQHLTEENLDRGQVMPALATPVMVPVN    | 56 |
| Pacific_walrus                         | MEKYTDSPTLQVEHS----                                         | SLQVENLILPPQIQHLTEENLDRGQVMPALATPVMVPVN    | 56 |
| Weddell_seal                           | MEKYTDSPTLQVEHS----                                         | SLQVENLILPPQIQHLTEENLDRGQVMPALATPVMVPVN    | 56 |
| giant_panda                            | MEKYTGSPTLQVEHS----                                         | SLQVENLILPPQIQHLTEENLDRGQVMPALATPVMVPVN    | 56 |
| polar_bear                             | MEKYTRSSPTLQVEHS----                                        | SLQVENLILPPQIQHLTEENLDRGQVMPALATPVMVPVN    | 56 |
| domestic_cat                           | MEKYTETPSTLQVEHS----                                        | SLQVEENLFLQPQIQHLTEENLDRGQVMPALATPVMVPVN   | 56 |
| Amur_tiger                             | MEKYTETPSTLQVEHS----                                        | SLQVEENLFLQPQIQHLTEENLDRGQVMPALATPVMVPVN   | 56 |
| Balaenoptera_acutorostrata_scammoni    | -----                                                       |                                            | 0  |
| killer_whale                           | -----                                                       |                                            | 0  |
| bottlenosed_dolphin                    | -----                                                       |                                            | 0  |
| Yangtze_River_dolphin                  | -----                                                       |                                            | 0  |
| sperm_whale                            | -----                                                       |                                            | 0  |
| chiru                                  | -----                                                       |                                            | 0  |
| Bison_bison_bison                      | -----                                                       |                                            | 0  |
| cattle                                 | -----                                                       |                                            | 0  |
| wild_yak                               | -----                                                       |                                            | 0  |
| water_buffalo                          | -----                                                       |                                            | 0  |
| goat                                   | -----                                                       |                                            | 0  |
| sheep                                  | -----                                                       |                                            | 0  |
| mouflon                                | -----                                                       |                                            | 0  |
| pig                                    | MENYIDSPPTLQVEHS----                                        | SLQAEENLILQPQMHPHTTEENPALRGQVMSALTPMMPVPC  | 56 |
| Bactrian_camel                         | MENYTESPPTLQVEHS----                                        | SLWAENLNPQPHMWHLTEKNPALRDQLMPALATPVMVPVN   | 56 |
| Arabian_camel                          | MENYTESPPTLQVEHS----                                        | SLWAENLNPQPHMWHLTEKNPALRDQLMPALATPVMVPVN   | 56 |
| Wild_Bactrian_camel                    | MENYTESPPTLQVEHS----                                        | SLWAENLNPQPHMWHLTEKNPALRDQLMPALATPVMVPVN   | 56 |
| alpaca                                 | MENYTESPPTLQVEHS----                                        | SLWAENLNPQPHMWHLTEKNPALRDQLMPALATPVMVPVN   | 56 |
| black_flying_fox                       | MEKYTESPPTMQVEHS----                                        | FFQVENPILPQVQHLTEENLDRGQVMSALATPMMPIFC     | 56 |
| large_flying_fox                       | MEKYTESPPTMQVEHS----                                        | FFQVENPILPQVQHLTEENLDRGQVMSALATPMMPIFC     | 56 |
| big_brown_bat                          | MEKHTESSPRLQVEHS----                                        | SLWVENLILQPQVQHLTEENTLDRQVMPALATPMMPLLC    | 56 |
| little_brown_bat                       | MEKHTESSPRLQVEHS----                                        | SLWVENLILQPQVQHLTEENTLDRQVMPALATPMMPLLC    | 56 |
| Brandts_bat                            | MEKHTESSPRLQVEHS----                                        | SLWVENLILQPQVQHLTEENTLDRQVMPALATPMMPLLC    | 56 |
| Myotis_davidii                         | MEKHTESSPTSQVEHS----                                        | SLWAENLILQPQVQHLTEENTLDRQVMPALATPMMPLLY    | 56 |
| European_shrew                         | MEKCTQSPPIKVEHL----                                         | SLQAEENMILESQWDHPTKENPDLRSQAISAVDITEMSSED  | 56 |
| star-nosed_mole                        | MEKHPESSPALQVEQP----                                        | SLQAEENRILPQVQVHLTEENLDRGQVMPALATPVMVPVN   | 56 |
| horse                                  | MEKYTESPPALQVEHA----                                        | SLQAEENLILRPQMQLYTEENPAMRGQVMSALATPMMPIFC  | 56 |
| Przewalskis_horse                      | MEKYTESPPALQVEHA----                                        | SLQAEENLILRPQMQLYTEENPAMRGQVMSALATPMMPIFC  | 56 |
| southern_white_rhinoceros              | MEKYTESPSTLQVEHS----                                        | SLWAENLILPQVQVHLTEENLDRGQVMPALATPMMPIFC    | 56 |
| Cape_golden_mole                       | MEKLTDSPPILKIEHP----                                        | SLWADNLIQVQVQHLTEENTLDRGQVMPALATPMMPIFC    | 56 |
| Cape_elephant_shrew                    | MEKTRSSPALQGGESDSGANLWAENMILGPPMQPLTEGNTLDRGQVMSALATPMMPIFC |                                            | 60 |
| African_savanna_elephant               | MENFTESPSTLQVEHS----                                        | SLWADNLIQVQVQVHLTEENTLDRGQVMPALATPMMPIFC   | 56 |
| Florida_manatee                        | MEKFTESPPTLQVEHS----                                        | SLWADNLIQVQVQVHLTEENTLDRGQVMPALATPMMPIFC   | 56 |
| small_Madagascar_hedgehog              | MEKLTDSPPPTLQVEHS----                                       | SLLTENQIPESQGGTLEENTLDRGQVMPALATPMMPIFC    | 56 |
| Orycteropus_afer_afer                  | MEKHTDSPTLQVEPS----                                         | SLWAENLILPQVQVHLTEENTLDRGQVMPALATPMMPIFC   | 56 |

Fig. S1

|                                        |                                                                  |     |
|----------------------------------------|------------------------------------------------------------------|-----|
| human                                  | SLEHLTQFPHG--DPANCSEFLTQVTTYLTALQISNPANDAQIKLFFDYLSQQLESCGIIISG  | 115 |
| chimpanzee                             | SLEHLTQFPHG--DPANCSEFLTQVTTYLTALQISNPANDAQIKLFFDYLSQQLESCGIIISG  | 115 |
| pygmy_chimpanzee                       | SLEHLTQFPHG--DPANCSEFLTQVTTYLTALQISNPANDAQIKLFFDYLSQQLESCGIIISG  | 115 |
| western_lowland_gorilla                | SLEHLTQFPHG--DPANCSEFLTQVTTYLTALQISNPANDAQIKLFFDYLSQQLESCGIIISG  | 87  |
| Sumatran_orangutan                     | SFEHLTQFPHG--DPANCSEFLTQVTTYLTALQISNPANDAQIKLFFDYLSQQLESCGIIISG  | 111 |
| northern_white-cheeked_gibbon_a        | SLEHLTQFPHG--DPANCSEFLTQVTTYLTALQISNPANDAQINVFFDYLSQQLESCGNIISG  | 115 |
| northern_white-cheeked_gibbon_b        | -----                                                            | 0   |
| sooty_mangabey                         | SLEHLTQFPHG--DPANHSEFLTQVTTYLTALQISNPANAQIKLFFDYLSQQLESCGIIISG   | 115 |
| green_monkey                           | SLEHLTQFPHG--DPANRSEFLTQVTTYLTALQISNPANDAQIKLFFDYLSQQLESCGIIISG  | 115 |
| crab-eating_macaque                    | SLEHLTQFPHG--DPANRSEFLTQVTTYLTSLQISNPANDAQIKLFFDYLSQQLESCGIIISG  | 115 |
| rhesus_monkey                          | SLEHLTQFPHG--DPANRSEFLTQVTTYLTSLQISNPANDAQIKLFFDYLSQQLESCGIIISG  | 115 |
| pig-tailed_macaque                     | SLEHLTQFPHG--DPANRSEFLTQVTTYLTSLQISNPANDAQIKLFFDYLSQQLESCGIIISG  | 115 |
| drill                                  | SLEHLTQFPHG--DPANRSEFLTQVTTYLTALQISNPANAQIKLFFDYLSQQLESCGIIISG   | 115 |
| olive_baboon                           | SLEHLTQFPHG--DPANRSEFLTQVTTYLTALQISNPANDAQIKLFFDYLSQQLESCGIIISG  | 115 |
| Colobus_angolensis_palliatus           | SLEHLTQFPHG--DPASRTEFLTQVTTYLTALQISNPANDAQIKLFFDYLSQQLESCGIIISG  | 115 |
| golden_snub-nosed_monkey               | SLEHLTQFPHG--DPANRSEFLTQVTTYLTALQISNPANDAQIKLFFDYLSQQLESCGIIISG  | 115 |
| Mas_night_monkey                       | -----                                                            | 0   |
| common_marmoset                        | -----MTTYLTALQISNPANDAQINLFDYLFQKLESCGIIISG                      | 38  |
| Bolivian_squirrel_monkey               | -----                                                            | 0   |
| Philippine_tarsier                     | SLEHLTHFPHG--DPASLSGFLAQVTTYMTALQISNPEDAHVKLFDDYLSQQLESCGVVSG    | 118 |
| gray_mouse_lemur                       | SFEHLTKIHD--DPASLAGFLAQVTTYLTDLQISNPDDARVKLFFDYLSQQLGSCGAIISR    | 115 |
| Coquerels_sifaka                       | SLEHLTQIRG--DPDLSGFLAQVTTYLTALQISDPDDAQIKLFFDYLSQQLGSCGAIISG     | 115 |
| small-eared_galago                     | SLEHLTQFPHG--DPASLSGFLAQVTTYLTALQISNHSDDAQAKLFFDYLSQQLGSCGVMSG   | 115 |
| Damara_mole-rat                        | -----                                                            | 0   |
| naked_mole-rat                         | -----                                                            | 0   |
| domestic_guinea_pig                    | -----                                                            | 0   |
| long-tailed_chinchilla                 | -----METFGIYSE                                                   | 9   |
| degu                                   | -----MENFGINCE                                                   | 9   |
| lesser_Egyptian_jerboa                 | VLEHLRPLHG--DPSLSGFLAQVTTYMTALKISNPADDAQVKHFFEYLSQQMQKHGVISE     | 115 |
| Ords_kangaroo_rat                      | SLEHHTFPHS--ESSNLSGFLAQVTTYLSPLKCPNPTEDAEVKHFCDVPIHQVQRCGIIISG   | 115 |
| prairie_vole                           | SGNHLTPQFHG--KPTSATGFLAQVTTYLTALKISNPADDAQVKHFFDCLSQMQSCDVVSG    | 115 |
| Chinese_hamster                        | SGDNLQFPHG--EPTSVTGFLAQVTTYLTALQISNPADDRVVKHFFDYLSQQVQSCDIIVSE   | 115 |
| golden_hamster                         | SSGNLQFPHG--ETTSVTGFLAQVTTYLTALQISNPADDAQVKHFFDYLSQQMQSCDIIVSE   | 115 |
| prairie_deer_mouse                     | SGDHLTPQFHD--ESTSVTGFLARVTTYLTALKISNPADDAQVKHFFDYLSQQMQSCDIIVSE  | 115 |
| house_mouse                            | SGDHIPQFPHG--NPASVKGFFAQVTTYLRALDISNPADNARVKHFFDYLSQQMQNCVLDISE  | 115 |
| Norway_rat                             | SGDHLTPQFPHG--NPASVKGFFAQVTTYLRALDISNPADDAQVKHFFDYLSQQMQNCVLDISE | 115 |
| Upper_Galilee_mountains_blind_mole_rat | SLEHLFQVHD--DPTSVSEFRAQVTTYLTSLKISNPADDAQVKHFFEYLSQQMQISDVKITG   | 93  |
| thirteen-lined_ground_squirrel         | SLENLTQFPHG--DPASVSGFLAQVTTYLTAFKIPNSVNGTQNKLVFDYLSQQMESCGVTSG   | 115 |
| rabbit                                 | SLEHFDQFHD--DPASLSGFLAQVTTYLTALKRNNPTDGDVKLFFDYLSQQMQKSRVYTSG    | 115 |
| American_pika                          | LLEHFAQFHG--DPDLSRFLAQITTYLNLKKNPADDQVKLIFDYISQQIENCRVTSG        | 115 |
| Chinese_tree_shrew                     | SLEHLTQFHD--DPARSELLAQMTTYLTDLQIPNPTDNGQVKHFFDYLSQEMENCGVIVSG    | 115 |
| Sunda_flying_lemur                     | SLEHFTQFHG--DPASFSEFLAQVTTYLTALQITNPENDVQVKLFFDYLSQQMESYGVIVSG   | 115 |
| dog                                    | LLEHFAQFHG--DPDLSRFLAQITTYLNLKKNPADDQVKLIFDYISQQIENCRVTSG        | 111 |
| domestic_ferret                        | SLEHLSQFHH--DPANLSIFLAQL----TTLKFPSPADDIQVKFFDYLSQQMESCGVIFG     | 111 |
| Pacific_walrus                         | SLEHLSQFHH--DPANLSRFLAQQL----ATLKFPPNPDDVQVKFFDYLSQQMESCGIISG    | 111 |
| Weddell_seal                           | SLEHLSQFHH--DPANLSRFLAQQL----TTLKFPNPADDVQVKFFDYLSQQMESCGIISG    | 111 |
| giant_panda                            | SLEHLSQFHR--DPANLSKFLAQQL----TTFKFPNPADDVQVKFFDYLSQQMEICGVVSG    | 111 |
| polar_bear                             | SLEHLSQFHH--DPANLSRFLVQL----TTFKFPNPADDVQVKFFDYLSQQMEICGVVSG     | 111 |
| domestic_cat                           | SLEHLSQFPHG--DPDNL-----L----TTVKIPNPADDVQVKFFLNLYLAQQMESCGVIVSG  | 105 |
| Amur_tiger                             | SLEHLSQFPHG--DPDNL-----L----TTVKIPNPADDVQVKFFLNLYLAQQMESCGVIVSG  | 105 |
| Balaenoptera_acutorostrata_scammoni    | -----                                                            | 0   |
| killer_whale                           | -----                                                            | 0   |
| bottlenosed_dolphin                    | -----                                                            | 0   |
| Yangtze_River_dolphin                  | -----                                                            | 0   |
| sperm_whale                            | -----                                                            | 0   |
| chiru                                  | -----                                                            | 0   |
| Bison_bison_bison                      | -----                                                            | 0   |
| cattle                                 | -----                                                            | 0   |
| wild_yak                               | -----                                                            | 0   |
| water_buffalo                          | -----                                                            | 0   |
| goat                                   | -----                                                            | 0   |
| sheep                                  | -----                                                            | 0   |
| mouflon                                | -----                                                            | 0   |
| pig                                    | SLEHLSQFPHG--DPTNISEFLAQMTTYLTTLKIPNPEDNAHVKFIIDHLSQQMESCGVIVSG  | 115 |
| Bactrian_camel                         | SLEHLSQSHD--DPASLSGLLAQVTTSSSTTFKITNPADDAHVKFSFDYLPQQMEVCGVIVSG  | 115 |
| Arabian_camel                          | SLEHLSQSHD--DPASLSGLLAQVTTSSSTTFKITNPADDAHVKFSFDYLPQQMEVCGVIVSG  | 115 |
| Wild_Bactrian_camel                    | SLEHLSQSHD--DPASLSGLLAQVTTSSSTTFKITNPADDAHVKFSFDYLPQQMEVCGVIVSG  | 115 |
| alpaca                                 | SLEHLSQSHD--DPASLSGLLAQVTTSSSTTFKITNPADDAHVKFSFDYLPQQMEVCGVIVSG  | 115 |
| black_flying_fox                       | SLEHLSQFYD--DTANISGFLAQVTTYLTILKIPNPADDAQVKFFDYLSQQMESCGIIST     | 115 |
| large_flying_fox                       | SLEHLSQFYD--DTANVSGFLAQVTTYLTILKIPNPADDAQVKFFDYLSQQMESCGIIST     | 115 |
| big_brown_bat                          | SLKNLSQFPHG--DPANISGFLAQVTTYLTTLKNTNPIHDDQVKFFDHLSSQQMESCGMISR   | 115 |
| little_brown_bat                       | SLKNLSQFPHG--DPANLSGFLAQVTTYLTTLKIPNPADDAQVKLFFDYLSQQMESCGIISR   | 115 |
| Brandts_bat                            | SLKNLSQFPHG--DPANLSGFLAQVTTYLTTLKIPNPADDAQVKLFFDYLSQQMESCGIISR   | 115 |
| Myotis_davidii                         | SLKNLSQFPD--DPANLSGFLAQVTTYLTTLKIPNPADDAQVKLFFDYLSQQMESCGMISR    | 115 |
| European_shrew                         | SFGYPSQVPGDSSANISKFLAQMTTCLSTTKLPKPNDDQAKVCPDHKSQQMESQVIVSG      | 116 |
| star-nosed_mole                        | SSEHPSKFHG--VPANLSGFLAEVTTYLTTPMVSNTADDTQVKLFFDYLSQQMEKCGVIVSG   | 115 |
| horse                                  | SLEHLSQFRD--DPASLSGFLAQVTTYLTALKIPNPADDAQVKFFDYLYQQMKSCGIIISG    | 115 |
| Przewalskis_horse                      | SLEHLSQFRD--DPASLSGFLAQVTTYLTALKIPNPADDAQVKFFDYLYQQMKSCGIIISG    | 115 |
| southern_white_rhinoceros              | SPEHLSQFPHG--DPANLARFLAQVTTYLTTLKIPNPADDAQIKFFDYLSQQMESCGIISG    | 115 |
| Cape_golden_mole                       | SLEHLNQFHV--DPANLSGFLAQATTYLTLASLN--YPADNAKAKFFIDYILQQVKRSGVLHG  | 113 |
| Cape_elephant_shrew                    | SPEHLSKFHV--NPASLSGFLAQATYFTALKNSNTADNAQVMSFLEYISRQMERVGTLPG     | 119 |
| African_savanna_elephant               | SLEHLSQFHV--DPANLSGFLAQVTTYLTTLKIPNPADDAQIKFFDYLSQQMESCGIISG     | 115 |
| Florida_manatee                        | SLEHPSQFHV--DPANLSGFLAQATTYLTALKTPNPADDAQVKFFDYISQQVERCRILPG     | 115 |
| small_Madagascar_hedgehog              | LFEHLNQFHV--DPDNPSELLAQVTTYLTALKPSNPAENTQIKCFIDYISQQAKKCGVILPG   | 115 |
| Orycteropus_afer_afer                  | SPEHLGQFDA--DPASISGFLAQATDDLTLKTLNPNVNAQVKFFDYISQQVERCGVLG       | 115 |

Fig. S1 (continued)

|                                        |                                                               |     |
|----------------------------------------|---------------------------------------------------------------|-----|
| human                                  | PKDSTLLKQYENLILEFQQSFGKPTKQEIINPLMNAKFDKGDNSSQQDPATFHLLAQNLIC | 175 |
| chimpanzee                             | PKDSTLLKQYENLILEFQQSFGKPTKQEIINPLMNAKFDKGDNSSQQDPATFHLLAQNLIC | 175 |
| pygmy_chimpanzee                       | PKDSTLLKQYENLILEFQQSFGKPTKQEIINPLMNAKFDKGDNSSQQDPATFHLLAQNLIC | 175 |
| western_lowland_gorilla                | PKDSTLLKQYENLILEFQQSFGKPTKQEIINPLMNAKFDKGDNSSQQDPATFHLLAQNLIC | 147 |
| Sumatran_orangutan                     | PKDSTLLKQYENLILEFQQSFGKPTKQEMNPLMNAKFDKGDNSSQQDPATFHLLAQNLIC  | 171 |
| northern_white-cheeked_gibbon_a        | PKDSTLLKQYENLILEFQQSFGKPTKQEMNPLMNAKFDKGDNSSQQDPATFHLLAQNLIC  | 175 |
| northern_white-cheeked_gibbon_b        | -----                                                         | 0   |
| sooty_mangabey                         | PKDSTLLKQYENCILEFQQSFGKPTKQEMNLLMNAKFDKGDNSSQQDPATFHLLAQNLIC  | 175 |
| green_monkey                           | SDKSTLLKQYENCILEFQQSFGKPTKQEMNPLMNAKFEKGDNSSQDPTTFQLLAQNLIC   | 175 |
| crab-eating_macaque                    | PKDSTLLKQYENCILEFQQSFGKPTKQEMNLLMNAKFDKGDNSSQQDPATFHLLAQNLIC  | 175 |
| rhesus_monkey                          | PKDSTLLKQYENCILEFQQSFGKPTKQEMNLLMNAKFDKGDNSSQQDPATFHLLAQNLIC  | 175 |
| pig-tailed_macaque                     | PKDSTLLKQYENCILEFQQSFGKPTKQEMNLLMNAKFDKGDNSSQQDPATFHLLAQNLIC  | 175 |
| drill                                  | PKDSTLLKQYENCILEFQQSFGKPTKQEMNLLMNAKFDKGDNSSQQDPATFHLLAQNLIC  | 175 |
| olive_baboon                           | PKDSTLLKQYENCILEFQQSFGKPTKQEMNLLMNAKFDKGDNSSQQDPATFHLLAQNLIC  | 175 |
| Colobus_angolensis_palliatus           | PKDSTLLKQYENCILEFQQSFGKPTKQEMNLLMNAKFDKGDNSSQQDPATFHLLAQNLIC  | 175 |
| golden_snub-nosed_monkey               | PKDSTLLKQYENCIVLEFQQSFGKPTKQEMNLLMNAKFDKGDNSSQQDPATFHLLAQNLIC | 175 |
| Mas_night_monkey                       | -----MNPLMNAKVDKGDNSSQQDPATFQLFAQNLIC                         | 32  |
| common_marmoset                        | PKDSTLLKQYENFVLEFQQLLGEPTKQEMNPLMNAKVDKGDNSSQQDPATFQLLAQNLMIC | 98  |
| Bolivian_squirrel_monkey               | -----MNPLMNDKVDKGDNSSQQDPATFQLLAQNLIC                         | 32  |
| Philippine_tarsier                     | PDQSTLLKQYENFVLEFQQSFGGPTKQKMSPPMNKTVDKGDNS--QDASTFKLFAQNLS   | 177 |
| gray_mouse_lemur                       | PDQSTLLKQYENFVLEFQQSFGGPTKQKMSPPMNKTVDKGDNS--QDASTFKLFAQNLS   | 175 |
| Coquerels_sifaka                       | PDQSTLLKQYENFVLEFQQSFGGPTKQKMSPPMNKTVDKGDNS--QDASTFKLFAQNLS   | 175 |
| small-eared_galago                     | PDQSTLLKQYENFVLEFQRFSGDSTKQEMNPLMNTKVDKGDNS--QDASTFKLFAQNLS   | 175 |
| Damara_mole-rat                        | -----MNHLMDAKVDRGDSTSDQDVTTFQFFSQNLSS                         | 32  |
| naked_mole-rat                         | -----MNPLMNDKVDKGDNTSQDVTTFQFFSQNLSS                          | 32  |
| domestic_guinea_pig                    | -----MNPLMNSKVEKGDNTSQDVTTFQFFSQNLSS                          | 32  |
| long-tailed_chinchilla                 | YNQ-----QNENCVLDFQSSGEPKQEMNPLMNPVKVDKGDNS--QDASTFKLFAQNLS    | 64  |
| degu                                   | YDQCAPLKENENFALDFQSSSRDP IEQEMNLLMNAKVDKVDSDGTFSSQNLSS        | 69  |
| lesser_Egyptian_jerboa                 | SNQNILLEQYENFVLEFQQSFGGPTKQKMSPPMNKTVDKGDNS--QDASTFKLFAQNLS   | 175 |
| Ords_kangaroo_rat                      | SDHSAVLQQYENFVLEFQKSFDEPMQKQEMNPLIFADADKENS--QDASTFKLFAQNLS   | 175 |
| prairie_vole                           | SNQSNLLKQYENFVLEFQQSFGGPTKQKMSPPMNKTVDKGDNS--QDASTFKLFAQNLS   | 174 |
| Chinese_hamster                        | SNQSHLLKQYENFVLEFQQSFGGPTKQKMSPPMNKTVDKGDNS--QDASTFKLFAQNLS   | 174 |
| golden_hamster                         | SNQSHLLKQYENFVLEFQQSFGGPTKQKMSPPMNKTVDKGDNS--QDASTFKLFAQNLS   | 174 |
| prairie_deer_mouse                     | SNQSNLLKQYENFVLEFQQSFGGPTKQKMSPPMNKTVDKGDNS--QDASTFKLFAQNLS   | 174 |
| house_mouse                            | STQNNLLKQYENFVLEFQQSFGGPTKQKMSPPMNKTVDKGDNS--QDASTFKLFAQNLS   | 174 |
| Norway_rat                             | SSQRNLLKQYENFVLEFQKSFDEPMQKQEMNPLIFADADKENS--QDASTFKLFAQNLS   | 174 |
| Upper_Galilee_mountains_blind_mole_rat | SDQISLLKQYENFVLEFQQSFGGPTKQKMSPPMNKTVDKGDNS--QDASTFKLFAQNLS   | 153 |
| thirteen-lined_ground_squirrel         | SDQSTILKQYENFVLEFQKSFDEPMQKQEMNPLMNTKVDKGDNS--QDASTFKLFAQNLS  | 164 |
| rabbit                                 | PNENITMLKQYENFVLEFQKSFDEPMQKQEMNPLMNTKVDKGDNS--QDASTFKLFAQNLS | 175 |
| American_pika                          | PNQAMLLKQYENFVLEFQQSFGGPTKQKMSPPMNKTVDKGDNS--QDASTFKLFAQNLS   | 175 |
| Chinese_tree_shrew                     | SDKRTLLKQYENFVLEFQQSFGGPTKQKMSPPMNKTVDKGDNS--QDASTFKLFAQNLS   | 175 |
| Sunda_flying_lemur                     | ADQSTMLKQYENFVLEFQKSFDEPMQKQEMNPLMNTKVDKGDNS--QDASTFKLFAQNLS  | 175 |
| dog                                    | SDQNTLLKQYEFVLEFQQSFGGPTKQKMSPPMNKTVDKGDNS--QDASTFKLFAQNLS    | 167 |
| domestic_ferret                        | PDQSSQKQYENFVLEFQQSFGGPTKQKMSPPMNKTVDKGDNS--QDASTFKLFAQNLS    | 166 |
| Pacific_walrus                         | PDQSTLLKQYENFVLEFQQSFGGPTKQKMSPPMNKTVDKGDNS--QDASTFKLFAQNLS   | 167 |
| Weddell_seal                           | PDQSTLLKQYENFVLEFQQSFGGPTKQKMSPPMNKTVDKGDNS--QDASTFKLFAQNLS   | 167 |
| giant_panda                            | PDQSTLLKQYENFVLEFQQSFGGPTKQKMSPPMNKTVDKGDNS--QDASTFKLFAQNLS   | 167 |
| polar_bear                             | PDQSTLLKQYENFVLEFQQSFGGPTKQKMSPPMNKTVDKGDNS--QDASTFKLFAQNLS   | 167 |
| domestic_cat                           | PNQSTLLKQYEFVLEFQQSFGGPTKQKMSPPMNKTVDKGDNS--QDASTFKLFAQNLS    | 160 |
| Amur_tiger                             | PNQSTLLKQYEFVLEFQQSFGGPTKQKMSPPMNKTVDKGDNS--QDASTFKLFAQNLS    | 160 |
| Balaenoptera_acutorostrata_scammoni    | -----MNPLVNAKVDKRDNFSSQDATTFFHLLAQNLR                         | 32  |
| killer_whale                           | -----MNPLMNAKVDKRDNFSSQDATTFFHLLAQNLR                         | 32  |
| bottlenosed_dolphin                    | -----MNPLMNAKVDKRDNFSSQDATTFFHLLAQNLR                         | 32  |
| Yangtze_River_dolphin                  | -----MNPLVNAKVDKRDNFSSQDATTFFHLLAQNLR                         | 32  |
| sperm_whale                            | -----MNPLVNAKVDKRDNFSSQDATTFFHLLAQNLR                         | 32  |
| chiru                                  | -----MNRLVNTKVDKEDNFSSQNASMFHLLAQNLR                          | 32  |
| Bison_bison_bison                      | -----MNRLVNTKVDKEDNFSSQNASMFHLLAQNLR                          | 32  |
| cattle                                 | -----MNRLVNTKVDKEDNFSSQNASMFHLLAQNLR                          | 32  |
| wild_yak                               | -----MNRLVNTKVDKEDNFSSQNASMFHLLAQNLR                          | 32  |
| water_buffalo                          | -----MNHLVNTKVDKEDNFSSQNASMFHLLAQNLR                          | 32  |
| goat                                   | -----MNHLVNTKVDKEDNFSSQNASMFHLLAQNLR                          | 32  |
| sheep                                  | -----MNHLVNTKVDKEDNFSSQNASMFHLLAQNLR                          | 32  |
| mouflon                                | -----MNHLVNTKVDKEDNFSSQNASMFHLLAQNLR                          | 32  |
| pig                                    | PDQSAALLKQYENFVLEFQQSFGGPTKQKMSPPMNKTVDKGDNS--QDASTFKLFAQNLS  | 174 |
| Bactrian_camel                         | PDESALLEQYENFVLEFQQSFGGPTKQKMSPPMNKTVDKGDNS--QDASTFKLFAQNLS   | 175 |
| Arabian_camel                          | PDESALLEQYENFVLEFQQSFGGPTKQKMSPPMNKTVDKGDNS--QDASTFKLFAQNLS   | 175 |
| Wild_Bactrian_camel                    | PDESALLEQYENFVLEFQQSFGGPTKQKMSPPMNKTVDKGDNS--QDASTFKLFAQNLS   | 175 |
| alpaca                                 | PDESALLEQYENFVLEFQQSFGGPTKQKMSPPMNKTVDKGDNS--QDASTFKLFAQNLS   | 175 |
| black_flying_fox                       | PDQNALLLKQYENFVLEFQQSFGGPTKQKMSPPMNKTVDKGDNS--QDASTFKLFAQNLS  | 175 |
| large_flying_fox                       | PDQNALLLKQYENFVLEFQQSFGGPTKQKMSPPMNKTVDKGDNS--QDASTFKLFAQNLS  | 175 |
| big_brown_bat                          | SEQSALLKQYENFVLEFQQSFGGPTKQKMSPPMNKTVDKGDNS--QDASTFKLFAQNLS   | 175 |
| little_brown_bat                       | SEQSALLKQYENFVLEFQQSFGGPTKQKMSPPMNKTVDKGDNS--QDASTFKLFAQNLS   | 175 |
| Brandts_bat                            | SEQSALLKQYENFVLEFQQSFGGPTKQKMSPPMNKTVDKGDNS--QDASTFKLFAQNLS   | 175 |
| Myotis_davidii                         | SEQSALLKQYENFVLEFQQSFGGPTKQKMSPPMNKTVDKGDNS--QDASTFKLFAQNLS   | 175 |
| European_shrew                         | PYQSTMLKQYENFVLEFQQSFGGPTKQKMSPPMNKTVDKGDNS--QDASTFKLFAQNLS   | 168 |
| star-nosed_mole                        | IDQNTLMRQYEDIVLEFQQSFGGPTKQKMSPPMNKTVDKGDNS--QDASTFKLFAQNLS   | 174 |
| horse                                  | PKDRTLLKQYENFVLEFQQSFGGPTKQKMSPPMNKTVDKGDNS--QDASTFKLFAQNLS   | 169 |
| Przewalskis_horse                      | PKDRTLLKQYENFVLEFQQSFGGPTKQKMSPPMNKTVDKGDNS--QDASTFKLFAQNLS   | 169 |
| southern_white_rhinoceros              | PDQSTLLKQYENFVLEFQQSFGGPTKQKMSPPMNKTVDKGDNS--QDASTFKLFAQNLS   | 170 |
| Cape_golden_mole                       | SNQRALLKQYENFVLEFQQSFGGPTKQKMSPPMNKTVDKGDNS--QDASTFKLFAQNLS   | 173 |
| Cape_elephant_shrew                    | SEQNTMLKQYEFVLEFQQSFGGPTKQKMSPPMNKTVDKGDNS--QDASTFKLFAQNLS    | 179 |
| African_savanna_elephant               | SDQNTLLKQYENFVLEFQQSFGGPTKQKMSPPMNKTVDKGDNS--QDASTFKLFAQNLS   | 175 |
| Florida_manatee                        | SDQSTLLKQYENFVLEFQQSFGGPTKQKMSPPMNKTVDKGDNS--QDASTFKLFAQNLS   | 175 |
| small_Madagascar_hedgehog              | SDQSILLKQYEFVLEFQQSFGGPTKQKMSPPMNKTVDKGDNS--QDASTFKLFAQNLS    | 169 |
| Orycteropus_afer_afer                  | SDQSTLLKQYENFVLEFQQSFGGPTKQKMSPPMNKTVDKGDNS--QDASTFKLFAQNLS   | 174 |

Fig. S1 (continued)

|                                        |                                                                 |     |
|----------------------------------------|-----------------------------------------------------------------|-----|
| human                                  | NET--NQSQGFQEKALADPNQDEESVTDMMNDLPDLITQCIQLDKKHSRPELLOQ--ETQL   | 232 |
| chimpanzee                             | NET--NQSQGFQKALADPNQDEESVTDMMNDLPDLITQCIQLDKKHSRPELLOQ--ETQL    | 232 |
| pygmy_chimpanzee                       | NET--NQSQGFQKALADPNQDEESVTDMMNDLPDLITQCIQLDKKHSRPELLOQ--ETQL    | 232 |
| western_lowland_gorilla                | IET--NQSQGFQEKALADPNQDEESVTDMMNDLPDLITQCIQLDKKHSRPELLOQ--ETQL   | 204 |
| Sumatran_orangutan                     | NET--NQSQGFQEKALADPNQDEESVTDMMNDLPDLITQCIQLDKKHSRPELLOQ--ETQL   | 228 |
| northern_white-cheeked_gibbon_a        | NET--KVSSKRH*-----                                              | 186 |
| northern_white-cheeked_gibbon_b        | -----MMDNLPDLITQCIQLDKKHSRPELLOQ--ETQL                          | 32  |
| sooty_mangabey                         | NET--SQNGQFEKAVDDLQDEESVTDMMNDLPDLITQCIQLDKKHSRPELLOQ--ETQL     | 232 |
| green_monkey                           | NET--NQNGQFKKTVDLLQDEESVTDMDNLPDLITQCIQLDKKQSDRPELLOQ--ETQL     | 232 |
| crab-eating_macaque                    | NET--SQNGQFEKAVDDLQDEESVTDMMNDLPDLITQCIQLDKKHSRPELLOQ--ETQL     | 232 |
| rhesus_monkey                          | NET--SQNGQFEKAVDDLQDEESVTDMMNDLPDLITQCIQLDKKHSRPELLOQ--ETQL     | 232 |
| pig-tailed_macaque                     | NET--SQNGQFEKAVDDLQDEESVTDMMNDLPDLITQCIQLDKKHSRPELLOQ--ETQL     | 232 |
| drill                                  | NET--SQNGQFEKAVDDLQDEESVTDMMNDLPDLITQCIQLDKKHSRPELLOQ--ETQL     | 232 |
| olive_baboon                           | NET--SQNGQFEKAVDDLQDEESVTDMMNDLPDLITQCIQLDKKHSRPELLOQ--ETQL     | 232 |
| Colobus_angolensis_palliatus           | NAT--NQNGQFEKAVDDLQDEESVTDMMNDLPDLITQCIQLDKKHSRPELLOQ--ETQL     | 232 |
| golden_snub-nosed_monkey               | NAT--NQNGQFEKAVDDLQDEESVTDMMNDLPDLITQCIQLDKKHSRPELLOQ--ETQL     | 232 |
| Mas_night_monkey                       | NET--NQNGRFEKALAGPNQDEESVTDIMDNLDPDLITQCIQLDKKHSRPELLOQ--ETQF   | 89  |
| common_marmoset                        | NET--NQNGQFEKALAGPNQDEESVTDITDNLDPDLITQCIQLDKKHSRPELLOQ--ETQF   | 155 |
| Bolivian_squirrel_monkey               | NET--NQNDQFEKALAGPNQDEESVTRGIMDNLDPDLITQCIQLDKKHSRPELLOQ--ETQF  | 89  |
| Philippine_tarsier                     | NET--NQGEQFQKGLADP IQDEESVTDNMDNLPDLITQCIQLDKKHSRPELLOQ--HTQL   | 234 |
| gray_mouse_lemur                       | HET--NQSCHFKQGLDSD IQDEESVTDMMNDLPDLITQCIQLDKKHSRPELLOQ--ETQL   | 232 |
| Coquerels_sifaka                       | HET--SQSCDFQKGLADSD IQDEESVTDMMNDLPDLITQCIQLDKKHSRPELLOQ--ETQL  | 232 |
| small-eared_galago                     | HET--NQSQGFQKGLADP IQHEKIDTMMNDLPDLITQCIQLDKKHSRPELLOQ--GNQL    | 232 |
| Damara_mole-rat                        | NKT--NQGEKFKQERLSDP IQDEEGNVTGMRRNPDLITQCIQLDKKYNDRPELLOQ--ETQF | 89  |
| naked_mole-rat                         | NKT--NHREKFKQGLADSD IQDEKSVTGMVGNLPDLITQCIQLDKKHSRPELLOQ--ETQF  | 89  |
| domestic_guinea_pig                    | NVT--NHKEKFKHRLCDHIQDEKSVTGMENIPDLITQCIQLDKKSNKPELLOQ--ETQL     | 89  |
| long-tailed_chinchilla                 | NET--NHREKFKHRLADP IQDEKSAATAMENLPDLITQCIQLDKKCNKPELLOQ--ENQL   | 121 |
| degu                                   | NET--NPKKIKQERLSDNIQDQKSVTAMMANLPDLITQCIQLDKKHSRPELLOQ--EAQL    | 126 |
| lesser_Egyptian_jerboa                 | NET--NQNDSLQEGLNDP IQDEE-ITDIMGNLPDLITQCIQLDKKLSNRPELLOQ--ETHV  | 231 |
| Ords_kangaroo_rat                      | NVTNTNQSNQFQKGLADP IQVESSITDMMNLPDLITQCIQLDKKY-DKPELLQ--ETQV    | 233 |
| prairie_vole                           | SES--SQSDFQKGLADP IQDEE-ITDIMSNDLPDLITQCIQLDKKYSRPELLOQ--ESQV   | 230 |
| Chinese_hamster                        | SET--SQSDQFQKGLADP IQDEE-ITDIMGNLPDLITQCIQLDKKHKDRPELLOQ--ETQV  | 230 |
| golden_hamster                         | SET--SQSDQFQKGLADP IQDEE-ITDIMGNLPDLITQCIQLDKKHKDRPELLOQ--ESQV  | 230 |
| prairie_deer_mouse                     | SET--SQSDQFQKGLADP IQDEE-ITDIMGNLPDLITQCIQLDKKYSRPELLOQ--ESQV   | 230 |
| house_mouse                            | RET--NQSDQFQKGLADP IQDEE-ITDIMGNLPDLITQCIQLDKKHKDRPELLOQ--ESHV  | 230 |
| Norway_rat                             | SET--DQRDQLQ---ADSTHDEE-ITDIMGNLPDLITQCIQLDKKHKDRPELLOQ--ESHV   | 227 |
| Upper_Galilee_mountains_blind_mole_rat | NDT--NQSDQFQKGLADP IQDEE-ITDIMGNLPDLITQCIQLDKKYSRPELLOQ--ETQV   | 209 |
| thirteen-lined_ground_squirrel         | SET--NPSDQFQKGLADP IQDKESVADMMGNLPDLITQCIQLDKKHSRPELLOQ--ETQL   | 221 |
| rabbit                                 | NEI--NKNDLQFQKGLADP IQDEESVTDMDNLPDLITQCIQLDKKHSRPELLOQ--ETQL   | 231 |
| American_pika                          | NEA--NQSDQFQKGLADP IQDEESVTDMDNLPDLITQCIQLDKKHSRPELLOQ--ETQL    | 231 |
| Chinese_tree_shrew                     | NEA--NQSDQFQKGLADP IQDEESVTDMDNLPDLITQCIQLDKKHSRPELLOQ--ETQL    | 232 |
| Sunda_flying_lemur                     | NEI--SQNDQFQKGLADP IQDEESVTDMMNDLPDLITQCIQLDKKHSRPELLOQ--ETQL   | 232 |
| dog                                    | NEA--NQSDHLEQEGLDSD IQDEESVTDMMNLPDLITQCIQLDKKHSRPELLOQ--ETQF   | 224 |
| domestic_ferret                        | NET--SQSDHFQKGLADP IQDDLSGTMMNDLPDLITQCIQLDKKHSRPELLOQ--ETQL    | 223 |
| Pacific_walrus                         | NET--NLSGNFQKGLADSD IQDEESVTDMMNDLPDLITQCIQLDKKQSDRPELLOQ--ETQL | 224 |
| Weddell_seal                           | NET--NLSDNFQKGLADSD IQDEESVTDMMNDLPDLITQCIQLDKKHSRPELLOQ--ETQL  | 224 |
| giant_panda                            | KET--DQSDHFQKGLADSD IQDEESVTDMMNDLPDLITQCIQLDKKHSRPELLOQ--ETHL  | 223 |
| polar_bear                             | KET--DQSDHFQKGLADSD IQDEESVTDMMNDLPDLITQCIQLDKKHSRPELLOQ--ETHL  | 223 |
| domestic_cat                           | NET--NQSDHFQKGLADSD IQDEESVTDMMNDLPDLITQCIQLDKKHSRPELLOQ--ETQL  | 217 |
| Amur_tiger                             | NET--TQRDHFQKGLADSD IQDEESVTDMMGNLPDLITQCIQLDKKHSRPELLOQ--ETQL  | 217 |
| Balaenoptera_acutorostrata_scammoni    | NET--NQSDHFQKGLADSD IQAEVSGTDLMDNLPDLITQCIQLDKKQSDRPELLOQ--EAQI | 89  |
| killer_whale                           | NET--NQSDHFQKGLADSD IQAEVSGTDLMDNLPDLITQCIQLDKKHSRPELLOQ--EAQI  | 89  |
| bottlenosed_dolphin                    | NET--NQSDHFQKGLADSD IQAEVSGTDLMDNLPDLITQCIQLDKKQSDRPELLOQ--EAQI | 89  |
| Yangtze_River_dolphin                  | NES--NQSDHFQKGLADSD IQAEVSGTDLMDNLPDLITQCIQLDKKQSDRPELLOQ--EAQI | 89  |
| sperm_whale                            | NET--NQSDHFQKGLADSD IQAEVSGTDLMDNLPDLITQCIQLDKKHSRPELLOQ--EAQI  | 89  |
| chiru                                  | DGF--NQSDHFQKGLADSD IQDEESVTDMMNDLPDLITQCIQLDKKHSRPELLOQ--EVQM  | 88  |
| Bison_bison_bison                      | DGF--NQSDHFQKGLADSD IQDEESVTDMMNDLPDLITQCIQLDKKHSRPELLOQ--EVQM  | 89  |
| cattle                                 | DGF--NQSDHFQKGLADSD IQDEESVTDMMNDLPDLITQCIQLDKKHSRPELLOQ--EVQM  | 89  |
| wild_yak                               | DGF--NQSDHFQKGLADSD IQDEESVTDMMNDLPDLITQCIQLDKKHSRPELLOQ--EVQM  | 89  |
| water_buffalo                          | DGF--NQSDHFQKGLADSD IQDEESVTDMMNDLPDLITQCIQLDKKHSRPELLOQ--EVQM  | 89  |
| goat                                   | DGF--NQSDHFQKGLADSD IQDEESVTDMMNDLPDLITQCIQLDKKHSRPELLOQ--EVQM  | 89  |
| sheep                                  | DGF--NQSDHFQKGLADSD IQDEESVTDMMNDLPDLITQCIQLDKKHSRPELLOQ--EVQM  | 89  |
| mouflon                                | DGF--NQSDHFQKGLADSD IQDEESVTDMMNDLPDLITQCIQLDKKHSRPELLOQ--EVQM  | 89  |
| pig                                    | NET--NQSDHFQKGLADSD IQAEVSGTMMNDLPDLITQCIQLDKKHSRPELLOQ--EAQI   | 231 |
| Bactrian_camel                         | NEP--DQSDHLEQEGLDSD IQDEESVTDMMNLPDLITQCIQLDKKHSRPELLOQ--EAQT   | 232 |
| Arabian_camel                          | NEP--DQSDHLEQEGLDSD IQDEESVTDMMNLPDLITQCIQLDKKHSRPELLOQ--EAQT   | 232 |
| Wild_Bactrian_camel                    | NEP--DQSDHLEQEGLDSD IQDEESVTDMMNLPDLITQCIQLDKKHSRPELLOQ--EAQT   | 232 |
| alpaca                                 | NEP--DQSDHLEQEGLDSD IQDEESVTDMMNLPDLITQCIQLDKKHSRPELLOQ--EAQT   | 232 |
| black_flying_fox                       | NKA--YQTDLFQKVLADSFQDEESVTDMMNDLPDLITQCIQLDKKHSRPELLOQ--EAQT    | 233 |
| large_flying_fox                       | NKA--YQTDHFQKVLADSFQDEESVTDMMNDLPDLITQCIQLDKKHSRPELLOQ--EAQT    | 233 |
| big_brown_bat                          | NET--NESDHFQKGLADSD IQDEESVTDMMNDLPDLITQCIQLDKKHSRPELLOQ--EATL  | 232 |
| little_brown_bat                       | NET--SESDFHQKGLADSD IQDEESVTDMMNDLPDLITQCIQLDKKHSRPELLOQ--EAQL  | 232 |
| Brandts_bat                            | NET--NESDHFQKGLADSD IQDEESVTDMMNDLPDLITQCIQLDKKHSRPELLOQ--EAQL  | 232 |
| Myotis_davidii                         | NET--NESDHFQKGLADSD IQDEESVTDMMNDLPDLITQCIQLDKKHSRPELLOQ--EAQF  | 232 |
| European_shrew                         | NET--NQSDHLEQEGLDSD IQDEESVTDMMNDLPDLITQCIQLDKKCNKPELLOQ--ETQL  | 225 |
| star-nosed_mole                        | NET--NQCDYFQKGLADSD IQDEESVTDMMNDLPDLITQCIQLDKKHSRPELLOQ--EAQL  | 231 |
| horse                                  | NET--NQTDHFQKGLADSD IQDEESVTDMMNDLPDLITQCIQLDKKHSRPELLOQ--EPQL  | 226 |
| Przewalskis_horse                      | NET--NQTDHFQKGLADSD IQDEESVTDMMNDLPDLITQCIQLDKKHSRPELLOQ--EPQL  | 226 |
| southern_white_rhinoceros              | NET--NQSDHFQKGLADSD IQDEESVTDMMNDLPDLITQCIQLDKKHSRPELLOQ--EAQL  | 227 |
| Cape_golden_mole                       | NEN--ILSDQLQKGLADSD IQDEESVTDMMNDLPDLITQCIQLDKKHSRPELLOQ--EAQL  | 230 |
| Cape_elephant_shrew                    | NEI--IVSDQLQKGLADSD IQDEESVTDMMNDLPDLITQCIQLDKKHSRPELLOQ--QAQL  | 236 |
| African_savanna_elephant               | NKT--MLSDHLEQEGLDSD IQDEESVTDMMNDLPDLITQCIQLDKKHSRPELLOQ--EAHL  | 232 |
| Florida_manatee                        | NKT--ILSDQLQKGLADSD IQDEESVTDMMNDLPDLITQCIQLDKKHSRPELLOQ--EAQL  | 232 |
| small_Madagascar_hedgehog              | SDT--ILSDPQLQKGLADSD IQDEESVTDMMNDLPDLITQCIQLDKKHSRPELLOQ--GAQI | 226 |
| Orycteropus_afer_afer                  | NEI--ILSDQLQKGLADSD IQDEESVTDMMNDLPDLITQCIQLDKKHSRPELLOQ--EAQL  | 231 |

Fig. S1 (continued)

|                                        |                                                                |     |
|----------------------------------------|----------------------------------------------------------------|-----|
| human                                  | PLLASL-IQHQAL-FSPTDPPPKKGIQLREGQLPLTPAKRARQOETQLCLYCSQSGHFT    | 290 |
| chimpanzee                             | PLLASL-IQHQAL-FSPTDPPPKKGIHLQEGQLPLTPAKRARQOETQLCLYCSQSGHFT    | 290 |
| pygmy_chimpanzee                       | PLLASL-IQHQAL-FSPTDPPPKKGIHLQEGQLPLTPAKRARQOETQLCLYCSQSGHFT    | 290 |
| western_lowland_gorilla                | PLLASL-IQHQAL-FSPIDPPPKKGIQLREGQLPLTPAKRARQOETQLCLYCSQSGHFT    | 262 |
| Sumatran_orangutan                     | PLLASL-IQHQAL-FSPTDPPPKKGIQLREGQQLPLTPAKRAHQOETQLCLYCSQSGHFT   | 286 |
| northern_white-cheeked_gibbon_a        | -----                                                          | 186 |
| northern_white-cheeked_gibbon_b        | PLLASL-IHQHAF-FSPTDPPPKKGIQLREGQLPLTPAKRAHQLETHLCLYCSQCGHFT    | 90  |
| sooty_mangabey                         | PLLASL-IQHQAL-FSPTDPPPKKGIQLREGQLPLTPAKRARQOETQLCLYCSQSGHFT    | 290 |
| green_monkey                           | PLLASL-IQHQAL-FSPTDPPPKKGIQLREGQLPLTPGKRARQOETQLCLYCSQSGHFT    | 290 |
| crab-eating_macaque                    | PLLASL-IQHQAL-FSPTDPPPKKGIQLREGQLPLTPAKRARQOETQLCLYCSQSGHFT    | 290 |
| rhesus_monkey                          | PLLASL-IQHQAL-FSPTDPPPKKGIQLREGQLPLTPAKRARQOETQLCLYCSQSGHFT    | 290 |
| pig-tailed_macaque                     | PLLASL-IQHQAL-FSPTDPPPKKGIQLREGQLPLTPAKRARQOETQLCLYCSQSGHFT    | 290 |
| drill                                  | PLLASL-IQHQAL-FSPTDPPPKKGIQLREGQLPLTPAKRARQOETQLCLYCSQSGHFT    | 290 |
| olive_baboon                           | PLLASL-IQHQAL-FSPTDPPPKKGIQLREGQLPLTPAKRARQOETQLCLYCSQSGHFT    | 290 |
| Colobus_angolensis_palliatus           | PLLASL-IQHQAL-FSPTDPPPKKGIQLREGQLPLTPAKRARQOETQLCLYCSQSGHFT    | 290 |
| golden_snub-nosed_monkey               | PLLASL-IQHQAL-FSPTDPPPKKGIQLREGQLPLTPAKRARQOETQLCLYCSQSGHFT    | 290 |
| Mas_night_monkey                       | PLLTSL-IQHQAL-VSPTDPPPKKGMQLREGQLPLTPAKRAYQOETQLCLYCNQSGHFT    | 147 |
| common_marmoset                        | PLLPSL-IQHQAL-VSPTDPPPKRGMQLREGQLPLTPAKRAYQOETQLCLYCNQSGHFT    | 213 |
| Bolivian_squirrel_monkey               | PMLTSL-IHQHAF-VSPTDPPPKKGMQLREGQLPLTPAKRAYQOETQLCLYCSQSGHFT    | 147 |
| Philippine_tarsier                     | PMLASP-IHHRAL-SSPSGPPHKEEPILLRGGQMPLTPAKRARQOENQLCLYCSQAGHFT   | 292 |
| gray_mouse_lemur                       | PMLASL-IQNPAL-SSSTGPPPKKEEPIQLRGSQPPLTPAKRARQOETQLCLYCSQADHFT  | 290 |
| Coquerels_sifaka                       | PMLASL-IHQHAF-SSFTGPPSKKEEPVQLRGQPPLTPAKRARQOETQLCLYCSQAGHFT   | 290 |
| small-eared_galago                     | SVRDPL-IHQHAF-SSSIGLPPKEEPIQOR-SQPPLTPAKRARQOETQLCLYCSQSGHFT   | 289 |
| Damara_mole-rat                        | PLLASL-IHQHAF-SSSIGSPKQOETQLRGGQLPLTPAKRAHQOETQLCLYCSQAGHFT    | 147 |
| naked_mole-rat                         | PLLGSLL-IHQHAF-SSSTGPPPKKEEPIKLRRGQPLTPAKRAHQOETQLCLYCSQAGHFT  | 147 |
| domestic_guinea_pig                    | PVLASL-IHQHAF-SSSTSPRPKEETIQLRGGQLPLTPAKRARQOETQLCLYCSQAGHFT   | 141 |
| long-tailed_chinchilla                 | PVLEFL-IHQHAF-SSSTGPPPKKEEPIQLRGGQLPLTPAKRARQOETQLCLYCSQAGHFT  | 179 |
| degu                                   | PVLEFL-IHQHAF-SSSMCPPKKEEPIQLRGG-LPLTPAKRARQOETQLCLYCSQAGHFT   | 183 |
| lesser_Egyptian_jerboa                 | PTFASL-IHQHAF-SSSMCPPKKEEPIQLRGG-LPLTPAKRARQOETQLCLYCSQAGHFT   | 290 |
| Ords_kangaroo_rat                      | PMLPSL-IYDKSL-SRPTVLPKDEETQLRGGHRLTPAKRARQOETQLCLYCSQAGHFT     | 291 |
| prairie_vole                           | PMFSSSTNHLHF-SRPTIGLQAKDEPKIQQAQLPVTPAKRARQOETQLCLYCSQAGHFT    | 289 |
| Chinese_hamster                        | PMFSSST-NHHQSF-LGLMGLPKDELKPFQGAQMPVTPAKRARQOETQLCLYCSQAGHFT   | 288 |
| golden_hamster                         | PVFSST-NHRQSF-LSPMVLPKDEFKSLQGAQMPVTPAKRARQOETQLCLYCSQAGHFT    | 288 |
| prairie_deer_mouse                     | PIFAST-TKHQSF-FSPKGLPKDEPKQFQGAQMPVTPAKRARQOETQLCLYCSQAGHFT    | 288 |
| house_mouse                            | PMFAST-NHHQSF-IGPVRPLPKDGPRLQGAHLPVTPAKRARQOETQLCVYCNQAGHFT    | 288 |
| Norway_rat                             | PMVASP-LCSQSF-LSPIRPLPKDGLKPMQGAHLPVTPAKRARQOETQLCLYCNQAGHFT   | 285 |
| Upper_Galilee_mountains_blind_mole_rat | SMFSSM-NHQHAF-LSPIRLAPKDEETQLRGMQLPVTPAKRARQOETQLCLYCSQAGHFT   | 267 |
| thirteen-lined_ground_squirrel         | PTLASL-TYHQSL-SSSTGLSPREEPSQLRGGQLPLTPAKRARQOETHLCLYCNQADHFT   | 279 |
| rabbit                                 | PVLASL-IHQHAF-SSSIGLPPKEEPIQLRGGQLPLTPAKRARQOETQLCLYCSQSGHFA   | 289 |
| American_pika                          | PVLASS-IHHEAL-SSSLIPSTKEEPIQLRGGQLPLTPAKRARQOETQLCLYCSQSGHFT   | 289 |
| Chinese_tree_shrew                     | PMLAPL-IHQHAF-SSSTGLPPKEEKIQLRGGQPLTPHLVNP*-----               | 273 |
| Sunda_flying_lemur                     | PMLASL-IHNFAL-SSPTCLLPKEEPIQLRGGQPLTPAKRARQOETKLCYCNQAGHFT     | 290 |
| dog                                    | PMLASL-IHQHAF-SSPTNLPKEEPIQLRGSQPPLTPAKRARQOETQLCLYCSQAGHFT    | 282 |
| domestic_ferret                        | PVLDCM-IHQHAF-SIPTDLPPKEEPIQLRGSQPPLTPAKRARQOEAQLCLYCSQAGHFT   | 281 |
| Pacific_walrus                         | PMLASM-IHQHAF-SSPTDLPPKEEPIQLRGSQPPLTPAKRALQOEAQLCLYCSQAGHFT   | 282 |
| Weddell_seal                           | PMLASM-IHQHAF-SSPTDLPPKEEPIQLRGSQPPLTPAKRALQOEAQLCLYCSQAGHFT   | 282 |
| giant_panda                            | PMFASM-IHQHAF-SGPTDLPPKEEPIQLRGSQPPLTPAKRGRQOEAQLCLYCSQAGHFT   | 281 |
| polar_bear                             | PMLASM-IHQHAF-SSPTDLPPKEEPIQLRGSQPPLTPAKRARQOEAQLCLYCSQAGHFT   | 281 |
| domestic_cat                           | PVLASL-IHQHAF-SSPTDVSAKEEPIQLRGSQPPLTPAKRARQOEAQLCLYCSQAGHFT   | 275 |
| Amur_tiger                             | PVLASL-IHQHAF-SSPTDVSAKEEPIQLRGSQPPLTPAK*-----                 | 255 |
| Balaenoptera_acutorostrata_scammoni    | PVLASL-IRHQAL-SNPTGPPPKEDPIQLRGSQPPLTPAKRARQOETQSCLYCSQAGHFT   | 147 |
| killer_whale                           | PVLASL-I-----SNPTGPPPKEDPIQLRGSQPPLTPAKRARQOETQSCLYCSQAGHFT    | 142 |
| bottlenosed_dolphin                    | PVLASL-I-----SNPTGPPPKEDPIQLRGSQPPLTPAKRARQOETQSCLYCSQAGHFT    | 142 |
| Yangtze_River_dolphin                  | PVLASL-IHQHAF-SNPTGPPPKEDPIQLRGSQPPLTPAKRARQOETQSCLYCSQAGHFT   | 147 |
| sperm_whale                            | PVLASL-IHQHAF-SNPTGPPPKEDPIQLRGSQPPLTPAKRARQOETQSCLYCSQAGHFT   | 147 |
| chiru                                  | PVLAHW-IHQHAF-SNPTGTAPKEDPIQLRGSQPPLTPAKRAHQOEVQACLCSQAGHFT    | 146 |
| Bison_bison_bison                      | PVLARW-IHQHAF-SNPTGPAPKEDRVQLRGSQPPLTPAKRARQOEVQACLCSQAGHFT    | 147 |
| cattle                                 | PVLARW-IHQHAF-SNPTGPAPKEDRIQLRGSQPPLTPAKRARQOEVQACLCSQAGHFT    | 147 |
| wild_yak                               | PVLARW-IHQHAF-SNPTGPAPKEDRIQLRGSQPPLTPAKRARQOEVQACLCSQAGHFT    | 147 |
| water_buffalo                          | PVLARW-IHQHAF-SNPTGPAPKEDRIQLRGSQPPLTPAKRARQOEVQACLCSQAGHFT    | 147 |
| goat                                   | PVLARW-IHQHAF-SNPTGPAPKEDPIQLRGSQPPLTPAKRAHQOEVQACLCSQAGHFT    | 147 |
| sheep                                  | PVLARW-IHQHAF-SNPTGPAPKEDPIQLRGNQPPLTPAKRAHQOEVQACLCSQPGLHT    | 147 |
| mouflon                                | PVLARW-IHQHAF-SNPTGPAPKEDPIQLRGNQPPLTPAKRAHQOEVQACLCSQPGLHT    | 147 |
| pig                                    | PVLASL-IHQHAF-SSSTGPPPKEDPVQLRGQPPLTPAKRARQOETHLCLYCSQSGHFT    | 289 |
| Bactrian_camel                         | SMLASL-VHHQAL-FSPRGPSSKEDPIHLRRSQPLTPAKRARQOETQLCLYCGQAGHFT    | 290 |
| Arabian_camel                          | SMLASL-VHHQAL-FSPRGPSSKEDPIQLRRSQPLTPAKRARQOETQLCLYCGQAGHFT    | 290 |
| Wild_Bactrian_camel                    | SMLASL-VHHQAL-FSPRGPSSKEDPIHLRRSQPLTPAKRARQOETHLCLYCGQAGHFT    | 290 |
| alpaca                                 | SMLASL-VHHQAL-FSPRGPSSKEDPIQLRRSQPLTPAKRARQOETQLCLYCGQAGHFT    | 290 |
| black_flying_fox                       | CLLIPT-IKSPS----QVHHWPWKRLYSCKEASHLSLRNPE--TRRNTVCLYCS*-----   | 280 |
| large_flying_fox                       | CLLIPT-IKSPS----QVHHWPWKRLYSCKEASHLSLRNPE--TRRNTVCLYCS*-----   | 280 |
| big_brown_bat                          | PVLSSL-IHQHAF-SSPSCPSSK-ELIQLRGSQPPLTPAKRARQOETQLCLYCSQADHFT   | 289 |
| little_brown_bat                       | PVLSSL-VHYQTL-SSPSCPSSK-ELIQLRGSQPPLTPAKRARQOETHLCLYCSQADHFT   | 289 |
| Brandts_bat                            | PVLSSL-VHYQTL-SSPSCPSSK-ELIQLRGSQPPLTPAKRARQOETHLCLYCSQADHFT   | 289 |
| Myotis_davidii                         | PVLSSL-VHYQTL-SSPSCPSSK-ELIQLRGSQPPLTPAKRARQOETHLCLYCSQADHFT   | 289 |
| European_shrew                         | PMLTSL-VCNQAL-YNPK-DSCCKENIQLHGHPPLTPVKRAHQOETHLCLYCSQSDHFT    | 282 |
| star-nosed_mole                        | TVLASH-IHQHAF-SSPTDPLPKDEMIQLRGSQPPLTPAKRARQOEAHLCLYCSQAGHFT   | 289 |
| horse                                  | PMLASL-INHQAL-SSPIGLSPKEEPIQLRGSQPPLTPAKRARQOETQLCLYCSQSGHFT   | 284 |
| Przewalskis_horse                      | PMLASL-INHQAL-SSPIGLSPKEEPIQLRGSQPPLTPAKRARQOETQLCLYCSQSGHFT   | 284 |
| southern_white_rhinoceros              | PKLASL-IHQHAF-SSPTGLSPKEEPIQLRGSQPPLTPAKRARQOETHLCLYCSQSGHFT   | 285 |
| Cape_golden_mole                       | PRLASP-IHQHAF-SIPIGPPIKETSQLRGGQLPLTPAKRVHQDQNLCLYCSQPAGHFT    | 288 |
| Cape_elephant_shrew                    | P-----IHHQYV-PSLTGPPAKEEPIQLRGGQLPLTPAKRARQOETELCLYCSQPAGHFT   | 289 |
| African_savanna_elephant               | PRLASL-IHQHAF-SNPTGPPAKEEPIQLRGGQLPLTPAKRARQOETHLCLYCSQAGHFT   | 290 |
| Florida_manatee                        | PRLASL-VHHQAL-SSPTGPPAKEEPIQLRGGQLPLTPAKRARQOETHLCLYCSQPAGHFT  | 290 |
| small_Madagascar_hedgehog              | PSLDSS-L-HPYI-STLTGPPAKEEPIQLRGGQPPLTPAKRARQOETHLCLYCSQPNHFT   | 283 |
| Orycteropus_afere_afere                | PRLPSL-IHQHAF-SRPTGPPPKKEEPIQLRGGQLPLTPAKRARQOETQLCLYCSQPAGHFT | 289 |

**Fig. S1 (continued)**

|                                        |                                |     |
|----------------------------------------|--------------------------------|-----|
| human                                  | RDCLAKRSRAPATTNNTAHQ*-----     | 310 |
| chimpanzee                             | RDCLAKRSQAPATTNNTAHQ*-----     | 310 |
| pygmy_chimpanzee                       | RDCLAKRSRAPATTNNTAHQ*-----     | 310 |
| western_lowland_gorilla                | RDCLAKRSRAPAMTNNNTAHQ*-----    | 282 |
| Sumatran_orangutan                     | RDCLARRSRAPATTNNTAHQ*-----     | 306 |
| northern_white-cheeked_gibbon_a        | -----                          | 186 |
| northern_white-cheeked_gibbon_b        | RDCLAKRS*-----                 | 98  |
| sooty_mangabey                         | RDCLAKRSRAPATTNNTAHQ*-----     | 310 |
| green_monkey                           | RDCLAKRSRTPAMTNNNTAHQ*-----    | 310 |
| crab-eating_macaque                    | RDCLAKRSRAPAMTNNNTAHQ*-----    | 310 |
| rhesus_monkey                          | RDCLAKRSRAPAMTNNNTAHQ*-----    | 310 |
| pig-tailed_macaque                     | RDCLAKRSRAPAMTNNNTAHQ*-----    | 310 |
| drill                                  | EDCLAKRSRAPATTNNTAHQ*-----     | 310 |
| olive_baboon                           | RDCLAKRSRAPATTNNTAHQ*-----     | 310 |
| Colobus_angolensis_palliatus           | RDCLAKRSRAPAMTNNNTAHQ*-----    | 310 |
| golden_snub-nosed_monkey               | RDCLAKRSRAPATTNNTAHQ*-----     | 310 |
| Mas_night_monkey                       | RDCLAKRSRALAMTNNNTAHQ*-----    | 167 |
| common_marmoset                        | RDCLAKRSRALAMTNNNSSTVRRDQESHF* | 241 |
| Bolivian_squirrel_monkey               | RDCLAKRSRALAVTNNNTAHQ*-----    | 167 |
| Philippine_tarsier                     | RDCLAKRSRAPARTNDIAHQ*-----     | 312 |
| gray_mouse_lemur                       | RDCLAKRSRAPARTNNNTTHQ*-----    | 310 |
| Coquerels_sifaka                       | RDCLAKRSRAPARTNNNTTHQ*-----    | 310 |
| small-eared_galago                     | RDCLAKRSRTPTRTNNNTTHQ*-----    | 309 |
| Damara_mole-rat                        | RDCLAKRSRAPERTNDTAHQ*-----     | 167 |
| naked_mole-rat                         | RDCLAKRSRAPERTDNTAHQ*-----     | 167 |
| domestic_guinea_pig                    | RDCLAKRSRAPARTNNPAYQ*-----     | 161 |
| long-tailed_chinchilla                 | RDCLAKRSRAPAWTNNPAHQ*-----     | 199 |
| degu                                   | KDCLAKRSRAPARTNNPDHQ*-----     | 203 |
| lesser_Egyptian_jerboa                 | RDCLAKRSRTPSKTKYTHQ*-----      | 310 |
| Ords_kangaroo_rat                      | EDCLAKRSRSPSTDNLA-HQ*-----     | 310 |
| prairie_vole                           | RECLAKRSRTPARRKM*-----         | 305 |
| Chinese_hamster                        | RECLAKRSRTPARRKNVH*-----       | 307 |
| golden_hamster                         | RECLAKRSRTPARRKM*-----         | 304 |
| prairie_deer_mouse                     | RECLAKRSRTPARRKM*-----         | 304 |
| house_mouse                            | RDCLAKRSRTPARRKM*-----         | 304 |
| Norway_rat                             | RDCLAKRSRTPARRKM*-----         | 301 |
| Upper_Galilee_mountains_blind_mole_rat | RDCLAKRSRTPASVKNATNK*-----     | 287 |
| thirteen-lined_ground_squirrel         | RDCLAKRSRAPASTNNPDHQ*-----     | 299 |
| rabbit                                 | RDCLAKRSRAPARTNNSPYQ*-----     | 309 |
| American_pika                          | RDCLAKRSRAPARTNNPPFQ*-----     | 309 |
| Chinese_tree_shrew                     | -----                          | 273 |
| Sunda_flying_lemur                     | RDCLAKRSRAPVRANPAHQ*-----      | 310 |
| dog                                    | RDCLAKRSRAPARINNSTHQ*-----     | 302 |
| domestic_ferret                        | RDCLAKRSRAPARINNPTHQ*-----     | 301 |
| Pacific_walrus                         | RDCLAKRSRAPARINNPTHQ*-----     | 302 |
| Weddell_seal                           | SDCLAKRSRAPARINNPTHQ*-----     | 302 |
| giant_panda                            | RDCLAKRSRAPARINNPTHQ*-----     | 301 |
| polar_bear                             | RDCLAKRSRAPARINNPTHQ*-----     | 301 |
| domestic_cat                           | RDCLAKRSRAPARINNPTRQ*-----     | 295 |
| Amur_tiger                             | -----                          | 255 |
| Balaenoptera_acutorostrata_scammoni    | RDCLAKRSRAPARINNPAHQ*-----     | 167 |
| killer_whale                           | RDCLAKRSRAPARINNPAHQ*-----     | 162 |
| bottlenosed_dolphin                    | RDCLAKRSRAPARINNPAHQ*-----     | 162 |
| Yangtze_River_dolphin                  | RDCLAKRSRAPARINNPAHQ*-----     | 167 |
| sperm_whale                            | RDCLAKRSRAPARINNPAHQ*-----     | 167 |
| chiru                                  | LDCLAKRSRAPARINNPTHQ*-----     | 166 |
| Bison_bison_bison                      | LDCLAKRSRAPERINNPTHQ*-----     | 167 |
| cattle                                 | LDCLAKRSRAPERINNPTHQ*-----     | 167 |
| wild_yak                               | LDCLAKRSRAPERINNPTHQ*-----     | 167 |
| water_buffalo                          | LDCLAKRSRAPARINNPTHQ*-----     | 167 |
| goat                                   | LDCLAKRSRAPARINNPTHQ*-----     | 167 |
| sheep                                  | LDCLAKRSRAPARINNPTHQ*-----     | 167 |
| mouflon                                | LDCLAKRSRAPARINNPTHQ*-----     | 167 |
| pig                                    | KDCLAKRSRAPTRTNNSSQQ*-----     | 309 |
| Bactrian_camel                         | RDCLAKRFRAPARTNNPAYQ*-----     | 310 |
| Arabian_camel                          | RDCLAKRFRAPARTNNPAYQ*-----     | 310 |
| Wild_Bactrian_camel                    | RDCLAKRFRAPARTNNPAYQ*-----     | 310 |
| alpaca                                 | RDCLAKRFRAPARTNNPAYQ*-----     | 310 |
| black_flying_fox                       | -----                          | 280 |
| large_flying_fox                       | -----                          | 280 |
| big_brown_bat                          | RDCLAKRSRAPARINNPAHQ*-----     | 309 |
| little_brown_bat                       | RDCLAKRSRAPARINNPAHQ*-----     | 309 |
| Brandts_bat                            | RDCLAKRSRAPARINNPAHQ*-----     | 309 |
| Myotis_davidii                         | RDCLAKRSRAPARINNPAHQ*-----     | 309 |
| European_shrew                         | RDCLAKRFRAPQRINNPTHK*-----     | 302 |
| star-nosed_mole                        | SDCLAKRSRAPARISNPTHQ*-----     | 309 |
| horse                                  | RDCLAKRSRAPARINDPAHQ*-----     | 304 |
| Przewalskis_horse                      | RDCLAKRSRAPARINDPAHQ*-----     | 304 |
| southern_white_rhinoceros              | RDCLAKRSRAPARINNPAHQ*-----     | 305 |
| Cape_golden_mole                       | KACLAKRSRAPARTNNPTHQ*-----     | 308 |
| Cape_elephant_shrew                    | ADCLAKRSRALTRTNNSTHQ*-----     | 309 |
| African_savanna_elephant               | KDCLAKRSRALARKNNPTHK*-----     | 310 |
| Florida_manatee                        | KDCLAKRSRAPARSNNPTHQ*-----     | 310 |
| small_Madagascar_hedgehog              | KDCLAKRSRAPARTSKPTHQ*-----     | 303 |
| Orycteropus_afer_afer                  | KDCLAKRSRAPARTNDPTHQ*-----     | 309 |

**Fig. S1 (continued)**

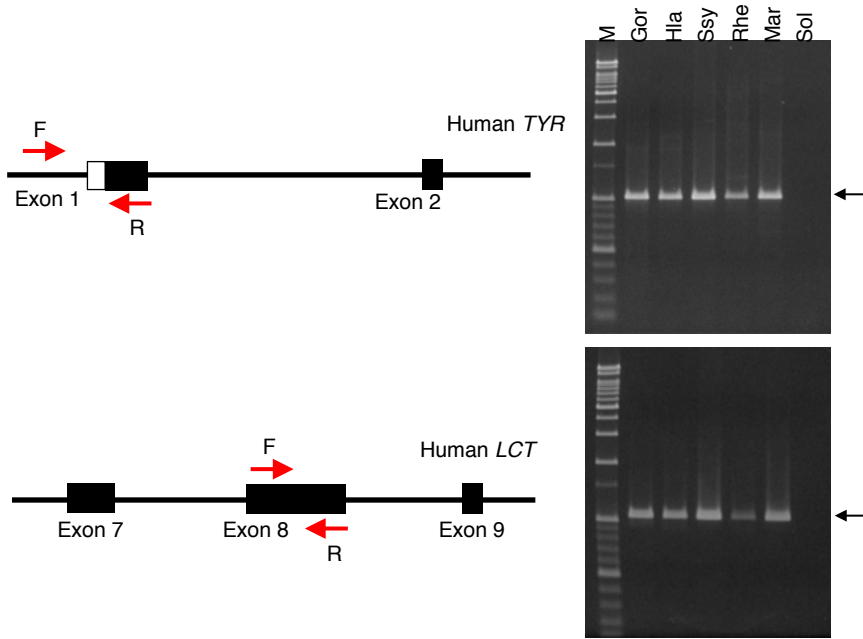

Fig. S2









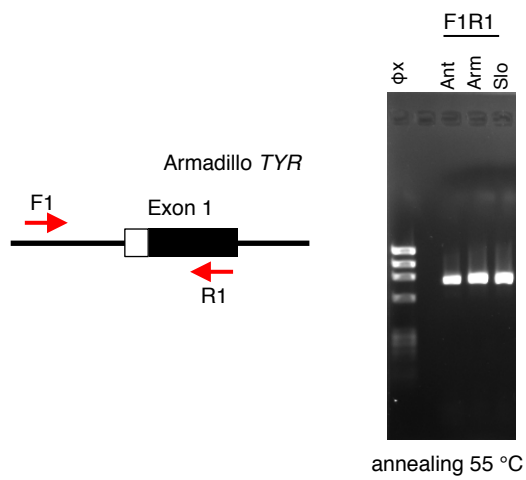

**Fig. S4**

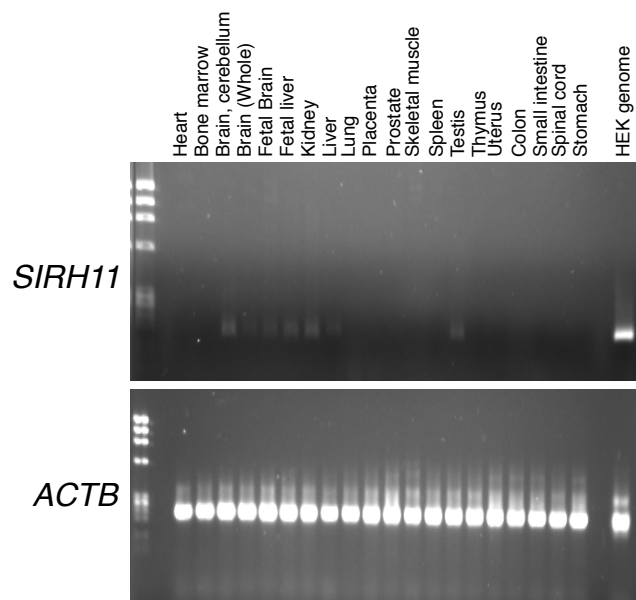

**Fig. S5**
